# Supplementary material for: RNA editing generates cellular subsets with diverse sequence within populations
Source: PubMed Central journal article supplement (PMC4947178; doi:10.1038/ncomms12145), 2016-07-15
Supplement: ncomms12145-s1.pdf [file ncomms12145-s1.pdf]

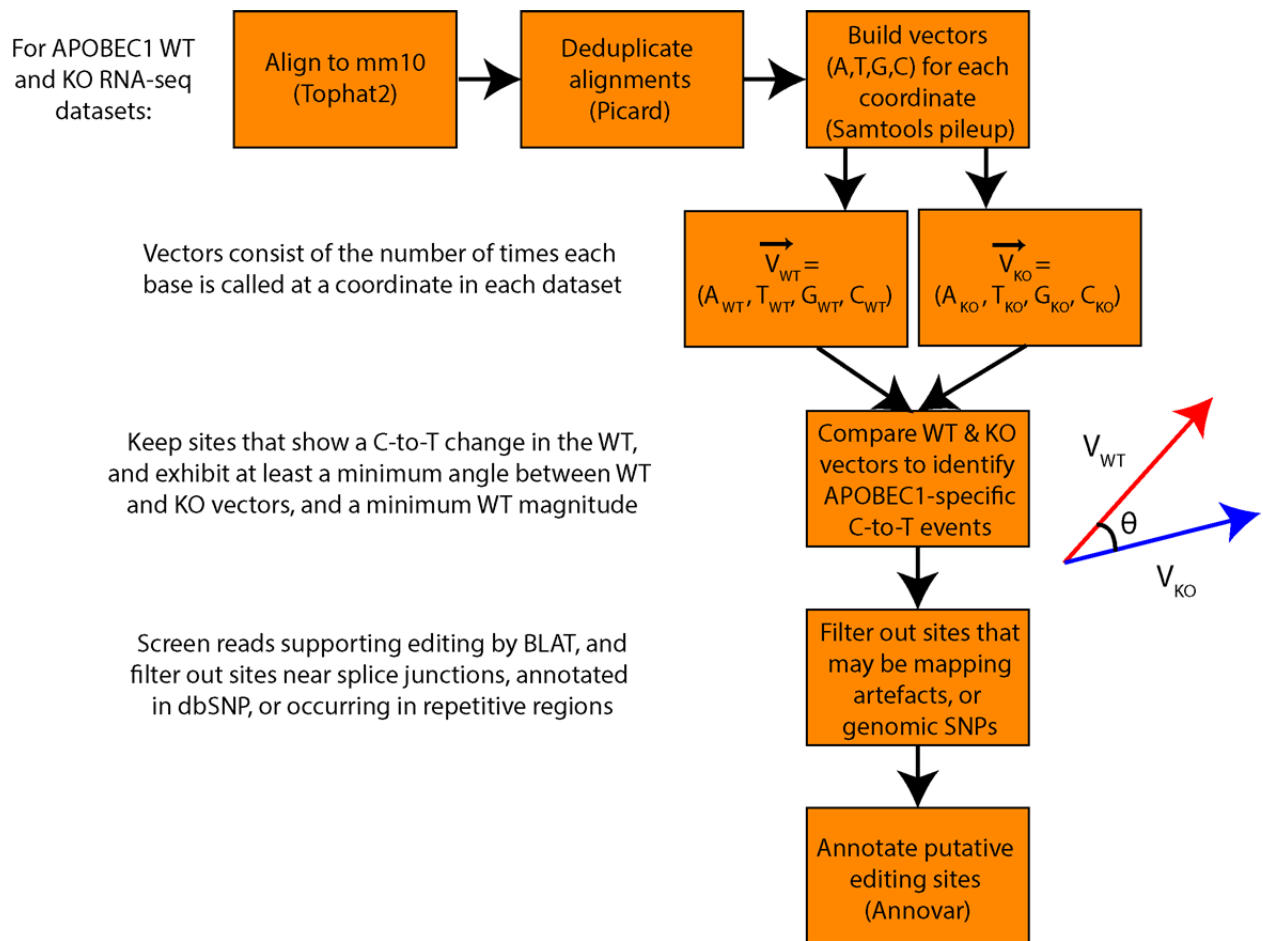

1  
 2 **Supplementary Figure 1. RNA editing detection pipeline.** Editing detection was performed by  
 3 comparing APOBEC1 wildtype and *APOBEC1*<sup>-/-</sup> RNA-seq datasets for each cell type. Putative  
 4 C-to-U edit sites occur in the Apobec1 wild-type sample, but not in the *APOBEC1*<sup>-/-</sup>, and pass  
 5 several stringent filters (see Methods for more details).  
 6  
 7

8

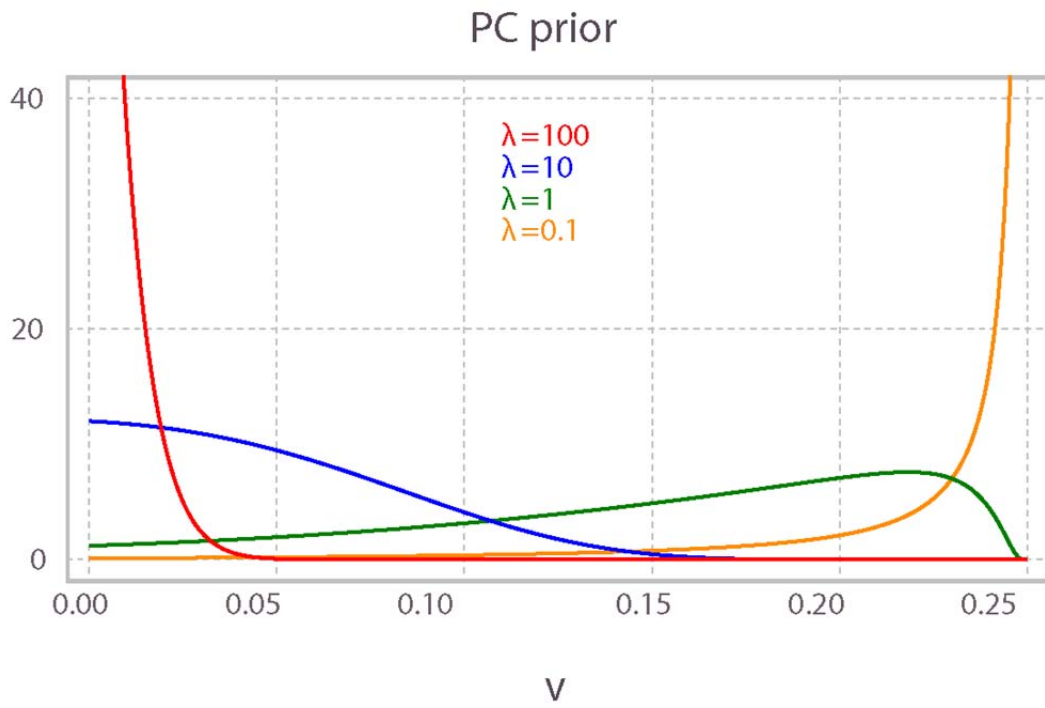

9 **Supplementary Figure 2. Penalized complexity prior of the model for various values of its**  
10 **hyperparameter  $\lambda$ .**

11

a Low range of editing rates

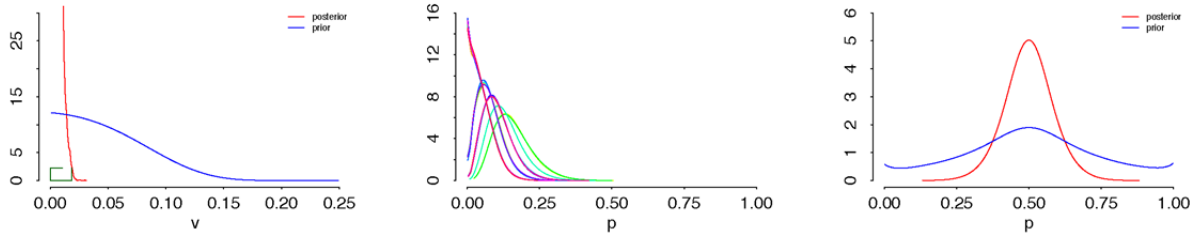

b Middle range of editing rates

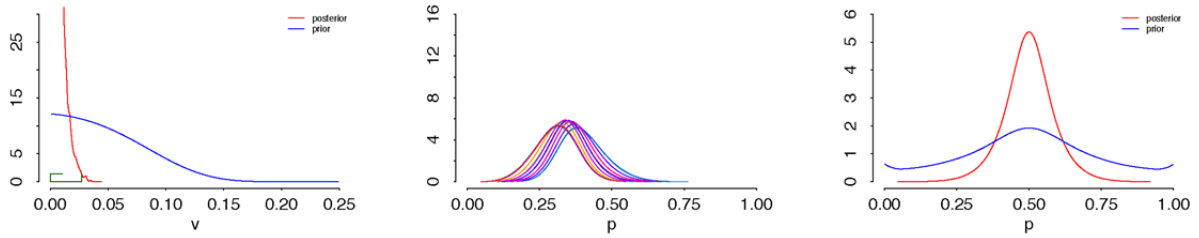

c Wide range of editing rates, with bulk mean in between the two modes

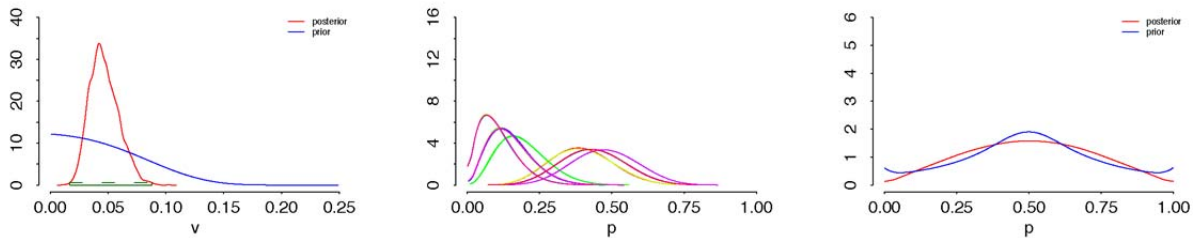

d Wide range of editing rates, with bulk mean closer to the major mode

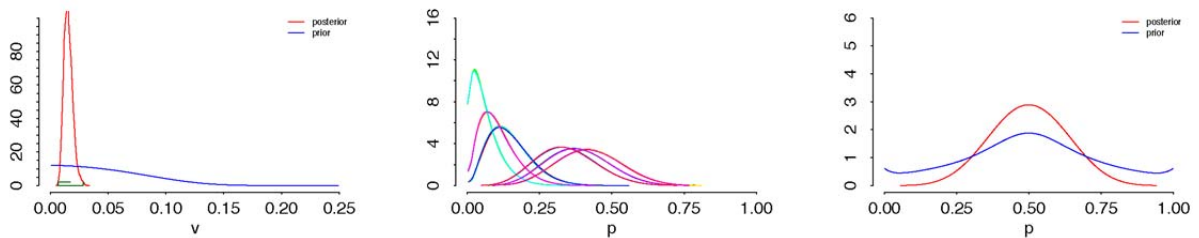

12

13 **Supplementary Figure 3. Effect of varying ranges of editing rates on model.** Histograms of  
14 variance of editing rates, editing rates and marginal editing rates for four artificial datasets, using  
15 editing rates within ranges we have observed from RNA-seq data. Each dataset consists of 20  
16 cells with 20 reads per cell. (a) Low range of editing, with single cell editing rates ranging from 0  
17 to 20%, and bulk editing rate set at 10%, (b) middle range of editing, with single cell editing  
18 rates ranging from 20-50%, and bulk editing rate set at 35%, (c) wide range of editing, with  
19 single cell editing rates ranging from 5-15% and 40-50%, with bulk editing rate set at 35%, and  
20 (d) wide range of editing, with single cell editing rates ranging from 5-15% and 40-50%, with  
21 bulk editing rate set at 10%.

22

23

- 1) Single BMDM were sorted into a well of a 96 well PCR plate containing lysis buffer.
- 2) Reverse transcription (in each well):

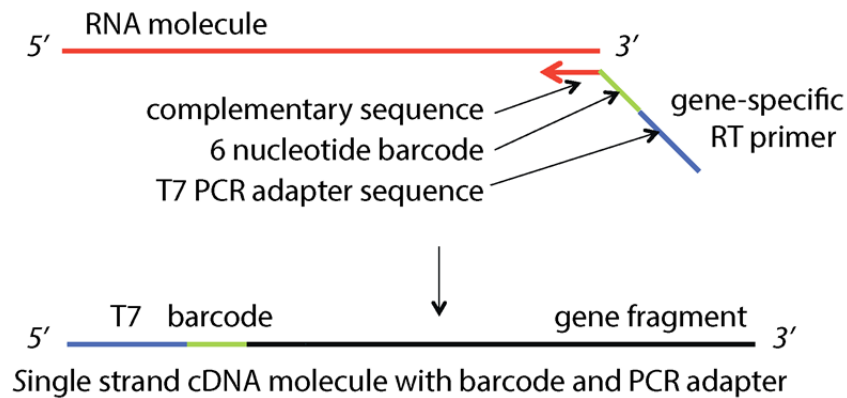

\* Each cDNA molecule has a different barcode

- 3) Digestion of free RT primers with Exonuclease I

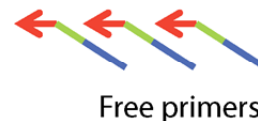

- 4) PCR amplification using a reverse gene-specific primer and T7 forward

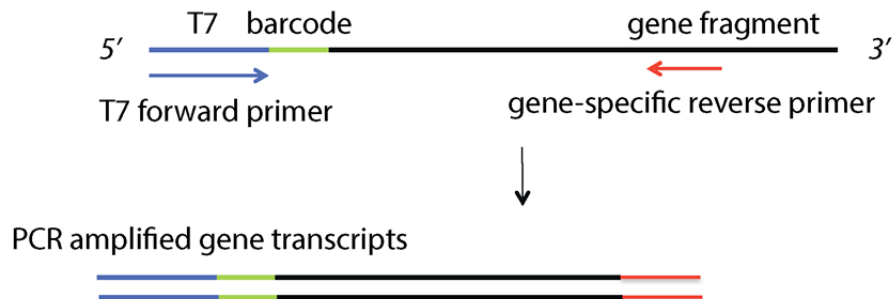

- 5) Each PCR fragment is cloned into a single bacterial colony.
- 6) Colonies are sequenced via Sanger sequencing.
- 7) PCR duplicates are removed: sequences yielding the same barcode are eliminated.

24 **Supplementary Figure 4. Schematic of single cell sequencing with unique barcodes per**  
25 **transcript.** Briefly, to analyze editing of specific sites in single cells, reverse-transcription/PCR  
26 amplification was done with gene specific primers and the OneStep RT-PCR kit (Qiagen), using  
27 a modified protocol. Single transcript molecules were tagged with barcoded gene-specific  
28 primers that have an additional universal sequence, used in reverse transcription. Primers were  
29 then digested with exonuclease I. Afterwards, a mix of universal forward and gene specific  
30 reverse primers were added to the PCR mix and 35 to 40 cycles of PCR were performed. The  
31 PCR products were introduced into bacteria using a TOPO TA cloning kit (Invitrogen) and  
32 single bacterial colonies were sequenced using Sanger sequencing. The resulting sequences were  
33 then aligned to the reference transcriptome (Macvector) and PCR duplicates were eliminated  
34 using the barcodes.

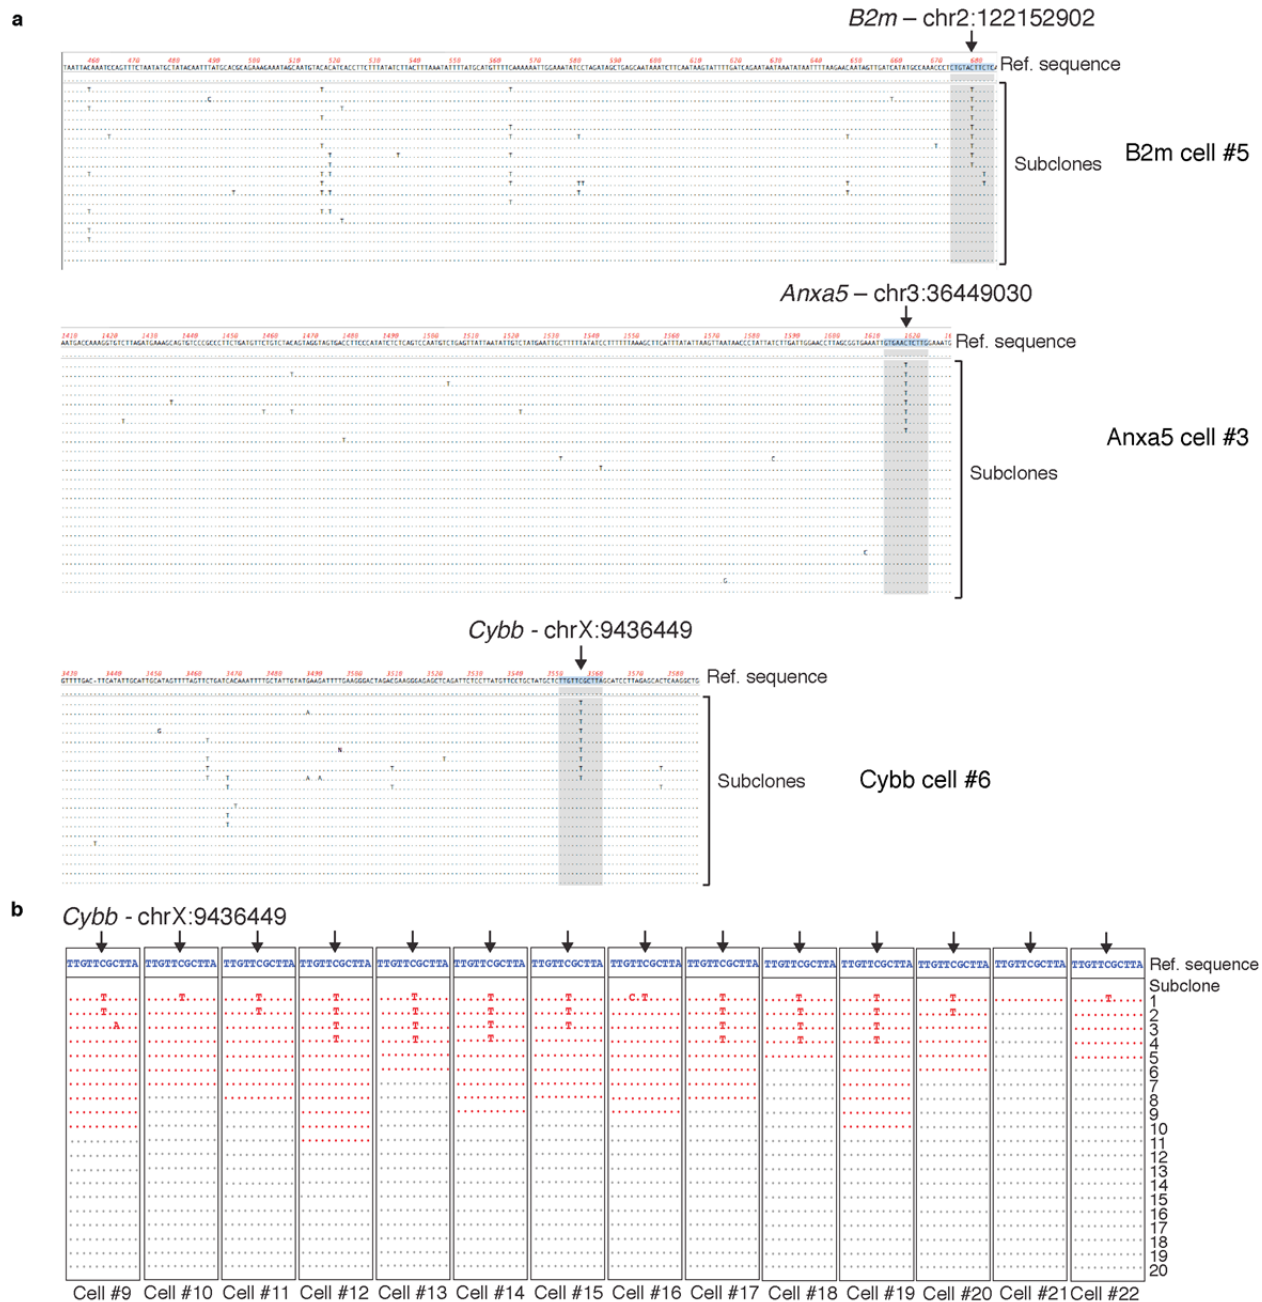

35  
36

37 **Supplementary Figure 5. Sanger sequencing of PCR amplicons from individual**  
 38 **macrophages.** (a) Amplicons (generated as indicated in Supplementary Fig. 4) display  
 39 additional edited sites in transcripts outside of the predicted and simulated sites in *B2m*, *Anxa5*,  
 40 and *Cybb*. (b) Amplicons from the *Cybb* transcript from additional single cells.

41

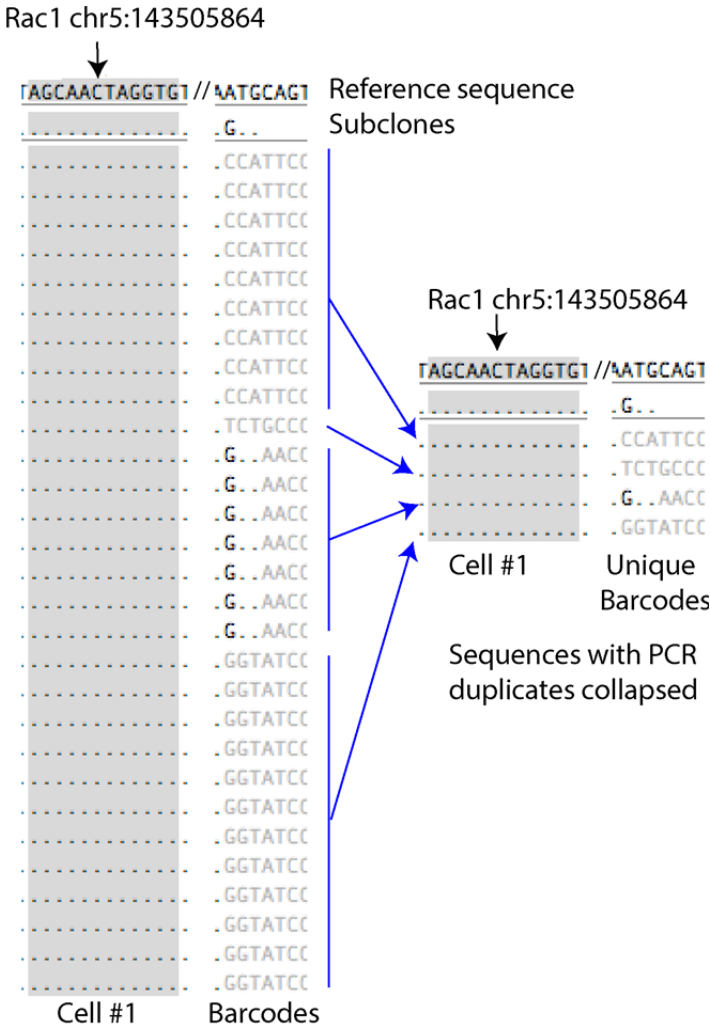

42 Sequences including PCR duplicates

43 **Supplementary Figure 6. Single cell PCR of lowly to moderately expressed transcripts**  
 44 **reveals high rates of PCR duplication.** Amplification of Rac1, a moderately expressed  
 45 transcript, from a single cell reveals high rates of PCR duplication as indicated by the  
 46 comparatively low rate of unique barcode sequences. The 29 sequences from cell #1 (left)  
 47 collapsed to only 4 uniquely barcoded sequences (right). The percentage of unique barcodes  
 48 from Rac1 amplicons across the 15 cells assayed is tabulated in Supplementary Table 2.

49

50 **Supplementary Table 1. RNA editing detection pipeline performance.** The number of hits as  
 51 a function of filtering parameters for bulk, PCR-deduplicated RNA-seq data. With the vector  
 52 approach, putative hits are filtered by a minimum magnitude (“mag”, of the vector containing the  
 53 putative edit) and a minimum angle (“ang”, in radians) between the wildtype and *APOBEC1*<sup>-/-</sup>  
 54 vectors at the same coordinate. Inverse hits are the number of hits yielded when treating the  
 55 *APOBEC1*<sup>-/-</sup> dataset as the wildtype, and the wildtype as the *APOBEC1*<sup>-/-</sup>. The inferred false  
 56 positive rate (FPR) is calculated as the number of inverse hits divided by the number of hits  
 57 called with the correct comparison.  
 58

| <b>Filters</b>                | <b>Hits</b> | <b>%UTR3</b> | <b>Inverse hits</b> | <b>Inferred FPR</b> |
|-------------------------------|-------------|--------------|---------------------|---------------------|
| <b>12mag,0.11ang</b>          | 510         | 95%          | 16                  | 3%                  |
| <b>12mag,0.24ang</b>          | 56          | 95%          | 1                   | 2%                  |
| <b>15mag,0.11ang</b>          | 410         | 96%          | 11                  | 3%                  |
| <b>15mag,0.24ang</b>          | 47          | 98%          | 1                   | 2%                  |
| <b>7.2mag,0.11ang</b>         | 662         | 94%          | 22                  | 3%                  |
| <b>No mag or angle filter</b> | 1752        | 94%          | 78                  | 4%                  |

59  
 60

61 **Supplementary Table 2. Percentage of uniquely-barcoded sequences obtained from Rac1**  
62 **amplicons derived from single macrophages.**  
63

| <b>Cell #</b> | <b>Unique barcode %</b> |
|---------------|-------------------------|
| 1             | 13%                     |
| 2             | 20%                     |
| 3             | 37%                     |
| 4             | 20%                     |
| 5             | 23%                     |
| 6             | 23%                     |
| 7             | 33%                     |
| 8             | 40%                     |
| 9             | 26%                     |
| 10            | 33%                     |
| 11            | 50%                     |
| 12            | 20%                     |
| 13            | 37%                     |
| 14            | 23%                     |
| 15            | 10%                     |

64  
65  
66



## 67 **Supplementary Methods**

### 68 **Hierarchical Model for Editing Rates**

69 Denote by  $x_{i,j} \in \mathbb{N}_0 = \mathbb{N} \cup \{0\}$  the number of edited reads that were measured at genomic  
70 coordinate  $i$  in specific cell  $j$ , and denote by  $n_{i,j} \in \mathbb{N}_0$  the corresponding total number of mapped  
71 reads (edited and unedited). We begin with two basic assumptions:

- 72  
73 (A1) The number  $n_{i,j}$  of total mapped reads does not depend on the editing rate  $p_{i,j}$ .  
74 (A2) The event that a particular read corresponds to an edited sequence is statistically  
75 independent of the same event for all other reads, conditional upon the edit rate  $p_{i,j}$ .

76  
77 With (A1), we assume that RNA-seq sampling of the transcriptome is unbiased, in that transcript  
78 detection is independent of sequence. While ideally detection of transcripts with RNA-seq  
79 should be agnostic of sequence, there are in actuality known biases to 3' ends of transcripts with  
80 poly-A enrichment, for instance, and with GC-content<sup>1</sup>. The mappability of a region also affects  
81 measurement (if we can't unambiguously map a read to a region, it isn't counted). But since we  
82 expect reads containing an edit versus an unedited sequence from the same transcript to be  
83 sampled at equal frequency, this assumption holds for our purposes. (A2) is an "exchangeability"  
84 assumption<sup>2</sup>, which is satisfied if no transcripts are counted more than once. Since we remove  
85 PCR duplicates from alignments, we expect this assumption to be fulfilled. Under these  
86 assumptions the first component of our hierarchical model is a binomial distribution (for the  
87 number of edited reads):

$$88 \quad x_{i,j} | p_{i,j}, n_{i,j} \sim \text{Bin}(n_{i,j}, p_{i,j}) \quad (1)$$

89 for each  $i = 1, 2, \dots, I$  and  $j = 1, 2, \dots, J$ .

90 The second component of the hierarchy is used to couple together the different edit rate  
91 parameters  $\{p_{i,j}\}$ . Denote by  $x_i \in \mathbb{N}_0$  the number of edited reads that were measured at genome  
92 coordinate  $i$  in the bulk RNA-seq experiment, and denote by  $n_i \in \mathbb{N}_0$  the corresponding total  
93 number of mapped reads. We then assume the following:

- 94 (A3) The edit rate  $p_i \in [0, 1]$  for the bulk experiment is approximately equal to  $x_i/n_i$ .  $\square$

- 95 (A4) Our  $J$  single cells can be considered to be drawn independently at random from the  
96 population of  $J'$  cells comprising the bulk experiment, where  $J' \gg J$ .

97 (A3) is satisfied if the number of total reads  $n_i$  from the bulk experiment associated with site  $i$  is  
98 sufficiently large. (A4) supposes that the  $J$  single cells that we consider are "typical", in a precise  
99 statistical sense. The combined effect of (A3) and (A4) is to place a hard statistical constraint on  
100 our hierarchical formulation, namely that

$$101 \quad \mathbb{E}[p_{i,j}] = p_i = \frac{x_i}{n_i}, \quad (2)$$

102 where the randomness in  $p_{i,j}$  occurs through the choice of the single cell  $j$  from the population ( $J'$   
 103 possibilities). Such a constraint could be highly informative and a careful statistical analysis  
 104 should therefore take this into account. However this class of problem does not appear to have  
 105 been considered in the existing binomial regression literature, where  $p_i$  would essentially be  
 106 treated as an unknown parameter to be estimated. The remainder of this section details a novel  
 107 modelling approach that accounts for the constraint in Equation (2).

108 Denote by  $v_i \in [0, p_i(1 - p_i)]$  the variance of the editing rates at location  $i$  across the  $J'$  cells that  
 109 were involved in the bulk experiment. Information sharing among the  $J$  editing rates  $\{p_{i,j}\}$  in  
 110 our (non-standard) setting was facilitated using a beta probability distribution

$$111 \quad p_{i,j} | p_i, v_i \sim \text{Beta}^*(p_i, v_i). \quad (3)$$

112 Here  $\text{Beta}^*(p, v)$  is the standard beta distribution  $\text{Beta}(a, b)$ , where  $a, b > 0$ , reparametrized in  
 113 the mean-variance parameterization; i.e.

$$114 \quad P(p; a, b) = \frac{p^{a-1}(1-p)^{b-1}}{B(a,b)}, \quad (4)$$

115 where  $B(a, b)$  is the Beta function and

$$116 \quad a = \left[ \frac{p(1-p)}{v} - 1 \right] p, \quad b = \left[ \frac{p(1-p)}{v} - 1 \right] (1 - p). \quad (5)$$

117 From Equation (2) we are able to fix  $p_i = x_i/n_i$  and thus Equation (5) represents a parametric  
 118 statistical model with one degree of freedom. Denote this distribution by  $B(v_i)$ , where the  
 119 dependence on  $p_i$  (assumed known) is suppressed for clarity. The remaining unknown parameter  
 120  $v_i$  is highly interpretable; indeed this is the quantity of scientific interest, with  $v_i = 0$   
 121 corresponding to identical editing rates across the  $J$  single cells and  $v_i = p_i(1 - p_i)$  corresponding  
 122 to statistically independent  $p_{i,j} | p_i, v_i \sim \text{Uniform}(0, 1)$  error rates across the  $J$  single cells.

123 The statistical specification is completed with one final assumption:

124 (A5) The edited sites indexed by  $i$  (and measurements thereof) can be treated independently.

125 (A5) improves interpretability and permits us to analyze each genomic location on an individual  
 126 basis. Since there is evidence that RNA editing can occur processively along transcripts<sup>3</sup>, there is  
 127 in actuality correlation in the editing rates across edited genomic coordinates  $i$  that occur on the  
 128 same gene. However it is far from clear how such association should be encoded into inference  
 129 and we leave this as an open direction for further research.

130 **Bayesian Inference.** The previous section specified a hierarchical statistical model such that, for  
 131 each location  $i$ , the model is parametrized by the edit rates  $p_{i,1}, \dots, p_{i,J}$  and their variance  $v_i$ .

132 Under (A5) we can restrict attention to just a single genomic location  $i$ ; in this section we leave  
 133 the  $i$  index implicit to improve clarity of the notation. Below we discuss how to estimate

134 parameters  $\theta = \{p_1, \dots, p_J, v\}$  from their associated data  $D = \{(x_j, n_j)\}$ . (Data from the bulk  
 135 experiment are assumed fixed and known throughout.)

136 Given that our analysis is primarily exploratory, we elected to follow the Bayesian paradigm and  
 137 we focus here on posterior inference for the model parameters  $\theta$ . In brief, the Bayesian approach  
 138 begins by placing a prior probability distribution

$$139 \quad P(\theta) = P(p_1, \dots, p_J | v) P(v) \quad (6)$$

140 over model parameters and then applying Bayes' rule

$$141 \quad P(\theta | D) = \frac{P(D | \theta) P(\theta)}{P(D)} \quad (7)$$

142 in order to obtain the posterior distribution  $P(\theta | D)$ . Formally the prior distribution  $P(\theta)$  encodes  
 143 our (possibly subjective) *a priori* uncertainty with respect to the model parameters. The first term  
 144 in Equation (6) is simply the beta density that was specified earlier in Equation (3), whilst the  
 145 second term  $P(v)$  requires elicitation. In this paper we take a Bayesian approach to prior  
 146 elicitation.

147 **Derivation of the PC Prior.** PC priors can be described as a fusion between conventional  
 148 subjective Bayesian analysis and objective Bayesian techniques<sup>4</sup>, meaning that they aim to  
 149 provide useful statistical regularization in the absence of subjective prior knowledge by  
 150 providing a semi-automatic approach to prior construction in hierarchical models. PC priors  
 151 specifically are predicated on the mantra that simpler “base” models should be preferred to more  
 152 complex alternatives. PC priors, recently proposed by<sup>5</sup>, have a natural connection to the well-  
 153 known Jeffreys' priors<sup>6</sup> in the sense that they are invariant to reparameterizations. However,  
 154 compared to Jeffrey's priors there is a more explicit connection with Occam's razor that fits  
 155 elegantly with the scientific null hypothesis ( $v = 0$ ) that we investigate in this work. Below we  
 156 construct a PC prior  $p(v)$  for the unknown variance parameter.

157 A PC prior is defined by explicitly stating a “base model”  $\mathcal{M}$ , with respect to which  $B(v)$  is a  
 158 more complex alternative. For us, the base model  $\mathcal{M}$  is the  $\mathcal{B}(v_0)$  distribution where  $v_0 = 0$ . i.e.  
 159 there is no randomness in the probability model. This coincides with the scientific null  
 160 hypothesis  $v = 0$  and captures Occam's principle. Then the Kullback-Leibler divergence  
 161  $KL(\mathcal{B}(v) || \mathcal{M})$  between these distributions is computed. Define the (pseudo-)distance

$$d(v) = \sqrt{2KL(\mathcal{B}(v) || \mathcal{M})}$$

162 Finally the PC prior is defined by placing an exponential distribution  $P(d) = \lambda e^{-\lambda d}$  on the  
 163 distance  $d$ . This explicitly penalizes model complexity, quantified in terms of distance to the base  
 164 model. The PC prior density follows via the chain rule:

$$165 \quad P(v) = \lambda e^{-\lambda d(v)} \left| \frac{\partial d(v)}{\partial v} \right|$$

166 Since the Kullback-Leibler distance is parametrization invariant, it follows that so is the PC  
 167 prior. Below we derive a closed-form expression for  $P(v)$ .

168 Begin by noting that the Kullback-Leibler divergence between two beta densities  $\text{Beta}(a, b)$ ,  
 169  $\text{Beta}(a_0, b_0)$ , in the standard parametrization, is given by

$$170 \quad \log\left(\frac{B(a_0, b_0)}{B(a, b)}\right) + (a - a_0)\psi(a) + (b - b_0)\psi(b) + (a_0 - a + b_0 - b)\psi(a + b). \quad (8)$$

171 Here  $\psi(y) = \frac{d \log \Gamma(y)}{dy}$  denotes the digamma function, the derivative of the gamma function. Next  
 172 we aim to take the limit  $v_0 \rightarrow 0$  in Equation (8), corresponding to  $a_0, b_0 \rightarrow \infty$ . In this limit we can  
 173 appeal to Sterling's approximation to obtain

$$174 \quad B(a_0, b_0) \sim \frac{\sqrt{2\pi} a_0^{a_0 - \frac{1}{2}} b_0^{b_0 - \frac{1}{2}}}{(a_0 + b_0)^{a_0 + b_0 - \frac{1}{2}}}. \quad (9)$$

175 This implies that asymptotically

$$176 \quad \begin{aligned} KL(\text{Beta}(a, b) || \text{Beta}(a_0, b_0)) &\sim a_0 \log(a_0) + b_0 \log(b_0) - (a_0 + b_0) \log(a_0 + b_0) \\ &\quad - a_0 \psi(a) - b_0 \psi(b) + (a_0 + b_0) \psi(a + b). \end{aligned} \quad (10)$$

177 From the definition of  $a_0$  and  $b_0$  in terms of  $p$  and  $v_0$ , given in (5), we obtain

$$179 \quad KL(\text{Beta}(a, b) || \text{Beta}(a_0, b_0)) \sim \frac{p(1-p)}{v_0} [\psi(a + b) - p\psi(a) - (1-p)\psi(b)] \quad (11)$$

180 and hence

$$181 \quad d(v) \sim \left\{ \frac{2p(1-p)}{v_0} [\psi(a + b) - p\psi(a) - (1-p)\psi(b)] \right\}^{1/2}. \quad (12)$$

182 Finally we assume an exponential distribution where

$$183 \quad P(d) = \begin{cases} C \lambda e^{-\lambda d} & \text{whenever } 0 < d < d_{max} \\ 0 & \text{otherwise} \end{cases} \quad (13)$$

184 where  $C^{-1} = \int_0^{d_{max}} \lambda e^{-\lambda y} dy$  is a normalising constant resulting from the truncation of the  
 185 exponential distribution,  $d_{max} = \max_{v \in \mathcal{V}} d(v)$  and

$$186 \quad \lambda \sim \left\{ \frac{v_0}{2p(1-p)} \right\}^{1/2}. \quad (14)$$

187 The PC prior with hyper-parameter  $\lambda$  is given by

$$188 \quad P(v) \sim \lambda \exp\{-\lambda[\psi(a + b) - p\psi(a) - (1-p)\psi(b)]\}^{1/2} \quad (15)$$

$$\times \left| \frac{\partial}{\partial v} [\underbrace{\psi(a+b) - p\psi(a) - (1-p)\psi(b)}_{(*)}]^{1/2} \right|$$

189 for all  $v \in V$  and  $P(v) = 0$  otherwise. The term  $(*)$  can be obtained using the chain rule:

$$190 \quad (*) = \frac{p(1-p)[p^2\psi_1(a)+(1-p)^2\psi_1(b)-\psi_1(a+b)]}{2v^2[\psi(a+b)-p\psi(a)-(1-p)\psi(b)]^{\frac{1}{2}}} \quad (16)$$

191 where  $\psi_1(y) = \frac{d\psi(y)}{dy} = \frac{d^2 \log \Gamma(y)}{dy^2}$  is the trigamma function. The PC prior derived above is fully  
 192 specified up to one hyper-parameter  $\lambda$ . Supplementary Fig. 2 displays the PC prior for a range of  
 193 values of its hyper-parameter  $\lambda$ .

194 Following the recommendation in <sup>5</sup> we set  $\lambda$  subjectively in terms of  $\mathbb{P}[v > v_L] < 0.01$ . The  
 195 quantity  $v_L$  corresponds to the level of variability in the editing rates  $p_1, \dots, p_j$  would be considered  
 196 *a priori* unlikely at the 1% level. Results in this paper were based on a conservative prior that  
 197 assumes little variability ( $v_L = 0.142$ ).

198 **Computational Implementation.** Bayesian inference is based on the posterior distribution of  
 199 parameters  $\theta$  given data  $D$ , however the associated probability density function  $P(\theta|D)$  in our  
 200 case is not available in closed-form. We therefore employed standard sampling techniques based  
 201 on Markov chain Monte Carlo (MCMC)<sup>7</sup> to obtain an empirical approximation to the posterior  
 202 distribution that becomes exact in the ergodic limit. Efficient MCMC proposals were constructed  
 203 by exploiting beta-binomial conjugacy, since the joint probability density

$$204 \quad P(\{p_j\}, v, \{x_j\} | \{n_j\}) = P(v)P(\{p_j\} | v)P(\{x_j\} | \{p_j\}, v) \quad (17)$$

$$205 \quad = P(v) \prod_{j=1}^J \text{Beta}^*(p_j; p, v) \text{Bin}(x_j; n_j, p_j) \quad (18)$$

206 implies that

$$207 \quad P(\{p_j\}, v | \{x_j\} | \{n_j\}) \propto P(v) \prod_{j=1}^J \text{Beta}(p_j; a + x_j, b + n_j - x_j) \quad (19)$$

208 where  $a, b$  are the beta distribution parameters corresponding to  $p, v$  in the mean-variance  
 209 parameterization. Here we write  $\text{Beta}(p_j; a + x_j, b + n_j - x_j)$  to denote the probability density  
 210 function of a beta distribution with parameters  $a + x_j, b + n_j - x_j$ , evaluated at the location  $p_j$ ,  
 211 with similar notation used in the transformed beta and binomial cases. It follows that we can  
 212 construct an efficient Metropolis-within-Gibbs algorithm where  $\{p_j\} | v$  can be sampled exactly  
 213 and  $v | \{p_j\}$  requires a Metropolis-Hastings step. For the Metropolis-Hastings step we employed  
 214 the logit-transform  $\square$

$$215 \quad v \mapsto \text{logit} \left( \frac{v}{p(1-p)} \right) \quad (20)$$

216 to provide support for the unnormalized distribution of  $v|\{p_j\}$  over the real line. In particular, the  
217 random adaptive Metropolis (RAM) sampler was used to sample from  $v|\{p_j\}$ , see<sup>8</sup>.

218 For each reported simulation, 11,000 Gibbs iterations were run, of which the first 1,000 were  
219 discarded as burn-in. At each Gibbs step, a single RAM iteration was run in order to exploit the  
220 Beta-Binomial conjugacy of the second Gibbs step.

221 **Development of credible intervals.** We formulate a classification rule in order to decide  
222 whether a genomic location is likely to display variable editing rates or otherwise, based on our  
223 available data  $D$ . For this purpose we chose to consider the  $100(1 - \alpha)\%$  highest posterior density  
224 (HPD) credible interval

$$225 \quad I_{\alpha,i}(D) = \{0 \leq v_i \leq p_i(1 - p_i) \text{ s. t. } P(v|D) > \delta_i\}, \quad (21)$$

226 defined such that  $\delta_i$  is the largest number satisfying

$$227 \quad \int_{I_{\alpha,i}(D)} P(v|D) dv = 1 - \alpha, \quad (22)$$

228 where  $P(v|D)$  is the posterior of  $v$ .

229 A classification rule is then constructed according to

$$230 \quad r_{\alpha,i}(D) = \begin{cases} 0 & \text{if } 0 \in I_{\alpha,i}(D) \\ 1 & \text{otherwise} \end{cases} \quad (23)$$

231 where  $r_{\alpha,i}(D) = 1$  corresponds to variable editing rates and  $r_{\alpha,i}(D) = 0$  corresponds to non-  
232 variable editing rates. That is, we classify a genomic location  $i$  as a location with variable editing  
233 rate when the  $100(1 - \alpha)\%$  HPD credible interval does not contain the base model  $v = 0$ .

234 In practice, the credible interval of  $v$  has been approximated via an iterative algorithm. For  
235 successive increments of  $\delta_i$ , the algorithm alternates between numerical root finding of  $P(v|D) =$   
236  $\delta_i$  with respect to  $v$  and numerical integration of the integral on the right-hand side of (22). The  
237 algorithm stops after reaching a pre-defined level of relative tolerance.

238

239

240

241

242 **Supplementary References**

- 243 1. Cheung, M.-S., Down, T. A., Latorre, I. & Ahringer, J. Systematic bias in high-throughput  
244 sequencing data and its correction by BEADS. *Nucleic Acids Res.* **39**, e103 (2011).
- 245 2. Leonard, T. Bayesian methods for binomial data. *Biometrika* **59**, 581–589 (1972).
- 246 3. Carmi, S., Borukhov, I. & Levanon, E. Y. Identification of widespread ultra-edited human  
247 RNAs. *PLoS Genet.* **7**, e1002317 (2011).
- 248 4. Berger, J. The case for objective Bayesian analysis. *Bayesian Anal.* **1**, 385–402 (2006).
- 249 5. Simpson, D. P., Rue, H., Martins, T. G., Riebler, A. & Sørbye, S. H. Penalising model  
250 component complexity: A principled, practical approach to constructing priors.  
251 *arXiv:1403.4630 [stat]* (2014).
- 252 6. Jeffreys, H. An Invariant Form for the Prior Probability in Estimation Problems. *Proceedings*  
253 *of the Royal Society of London A: Mathematical, Physical and Engineering Sciences* **186**,  
254 453–461 (1946).
- 255 7. Gilks, W. R. in *Encyclopedia of Biostatistics* (John Wiley & Sons, Ltd, 2005).
- 256 8. Haario, H., Saksman, E. & Tamminen, J. An adaptive Metropolis algorithm. *Bernoulli* **7**,  
257 223–242 (2001).
- 258
